# Supplementary material for: Mitochondrial stress induces AREG expression and epigenomic remodeling through c-JUN and YAP-mediated enhancer activation
Source: PubMed Central journal article supplement — Nucleic Acids Res. 2022 Sep 12;50(17):9765–79. doi: 10.1093/nar/gkac735 (PMC9508833; doi:10.1093/nar/gkac735), 2022-09-12
Supplement: gkac735_supplemental_file.pdf [file gkac735_supplemental_file.pdf]

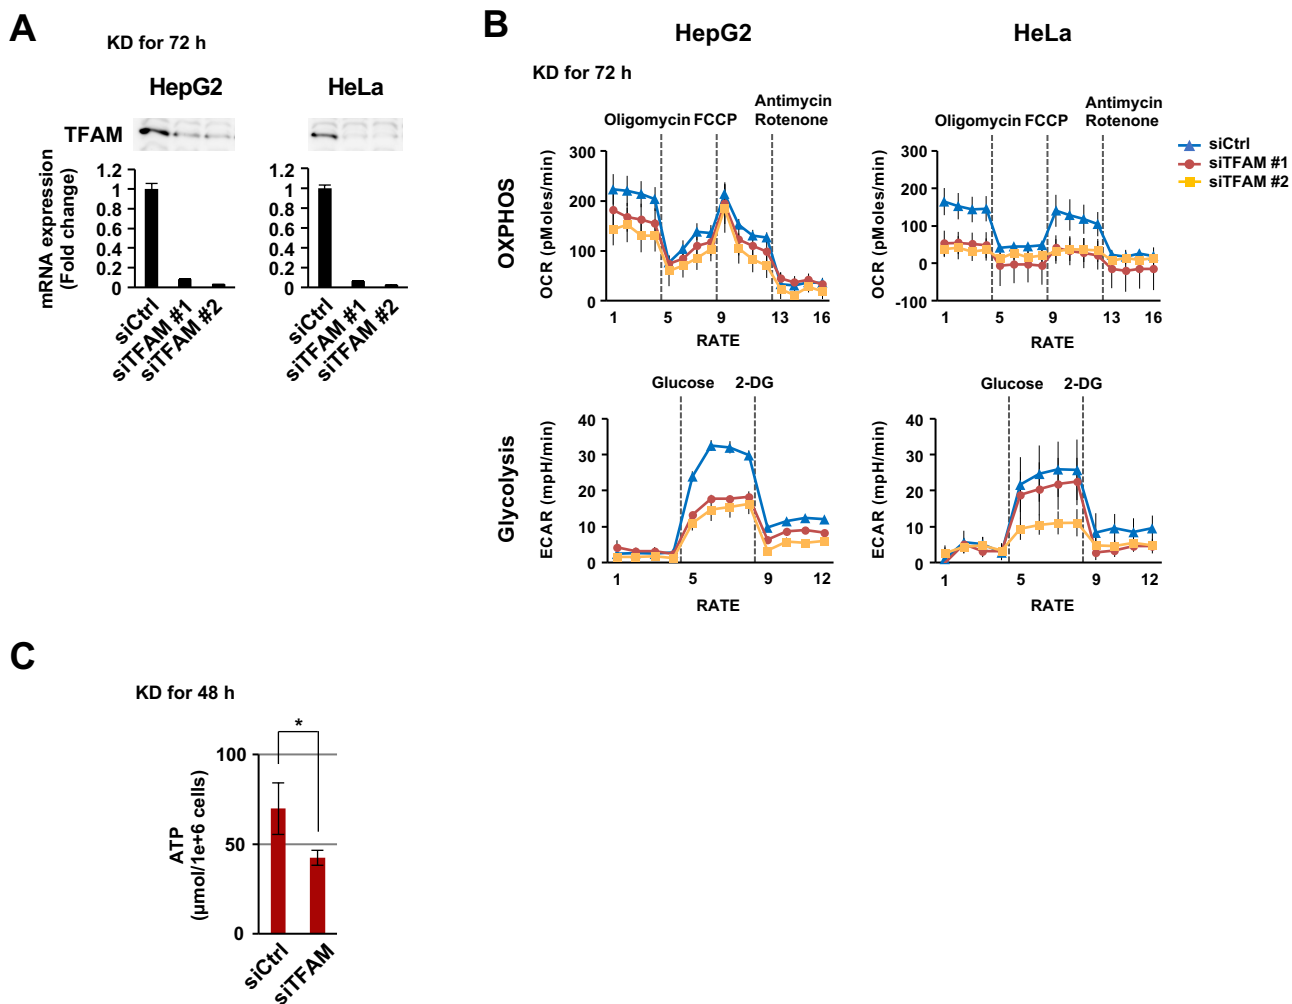

### Supplementary Figure S1.

(A) Protein and mRNA levels of TFAM were analyzed 72 h after TFAM-KD (siTFAM #1, #2) or control-KD (siCtrl). 10 μg of total protein was used for the western blot analysis. mRNA expression was normalized by the *RPLP0* gene and indicated as mean ± SD ( $n = 3$ ).

(B) Effect of TFAM-KD on the OXPHOS and glycolysis capacity in HepG2 and HeLa cells. OXPHOS activity was determined by measuring the OCR using the XF24 Analyzer. During the real-time measurement, respiratory chain inhibitors were added to the culture at the indicated time points. Values are mean ± SD of five assay wells.

(C) Effect of TFAM-KD on ATP production. Intracellular ATP concentrations in HepG2 cells were measured 48 h after control and TFAM-KD (siTFAM #1). ATP concentration was normalized to the cell number.  $n = 3$ , data are represented as mean ± SD. \* $p < 0.05$ .

**A**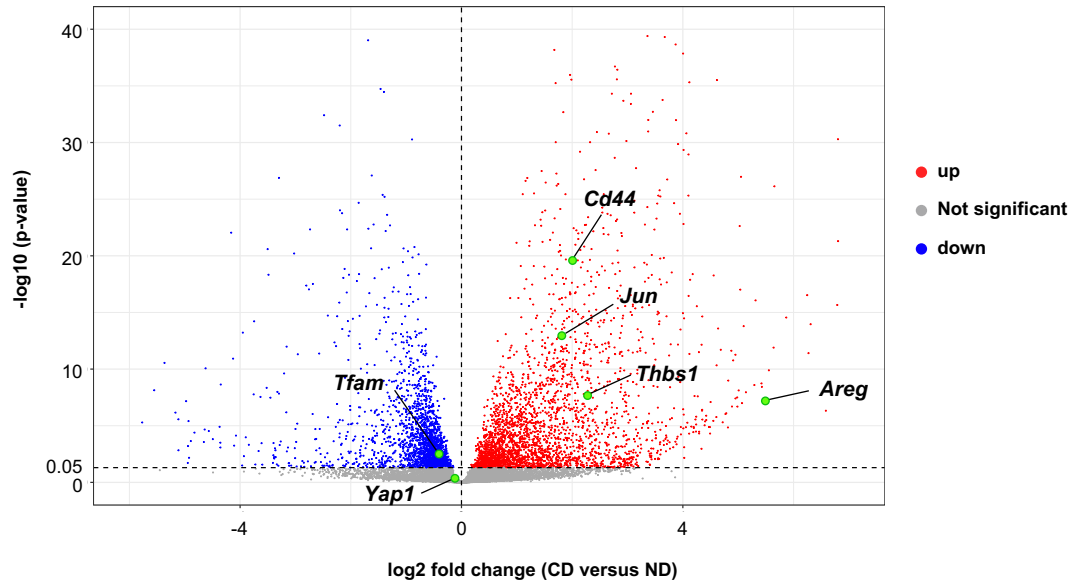**B**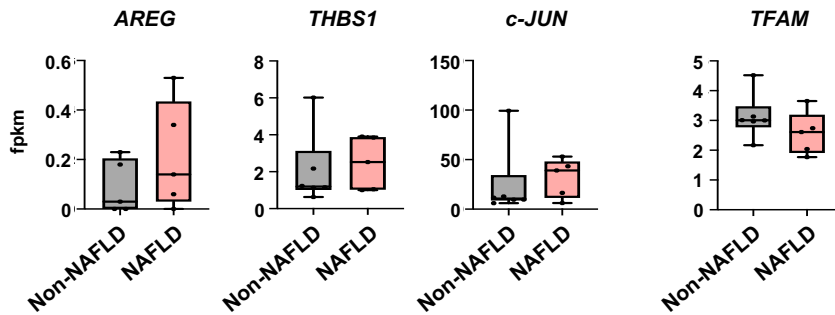**Supplementary Figure S2.**

(A) Volcano-plot of RNA sequencing data from NASH model mice (Heintz et al. 2020). Up-regulated and down-regulated genes are indicated.

(B) Expression of AREG, THBS1, and mitochondrial stress-related genes in liver tissues of 5 NAFLD patients and 6 non-NAFLD donors (Hou et al., 2021).

**A**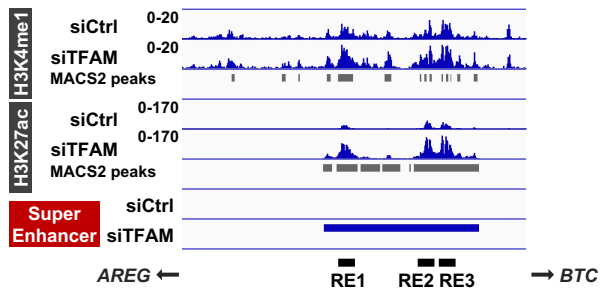**B**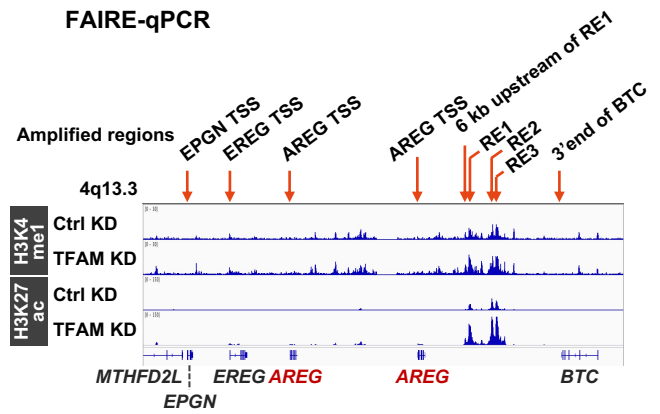**C**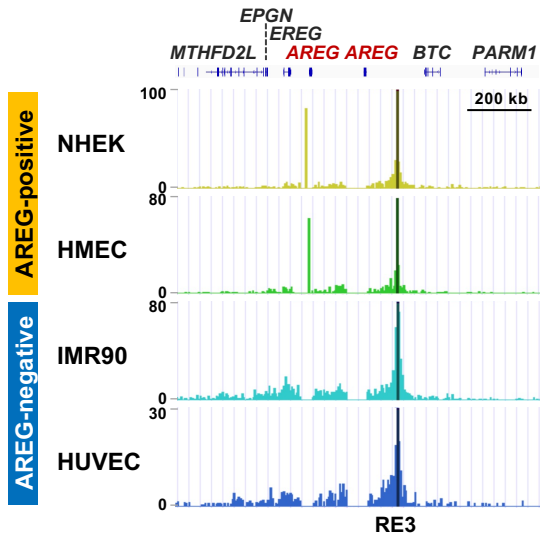

KD for 24 h

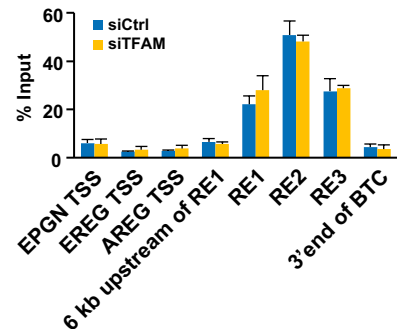**D**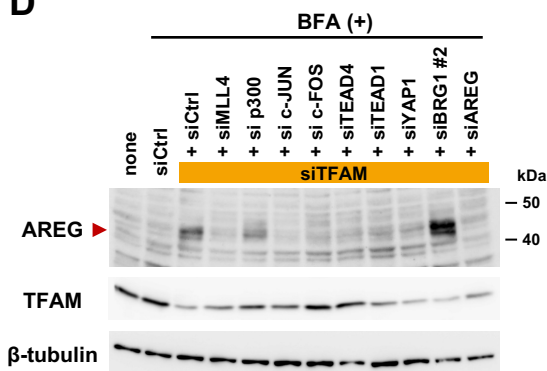**E**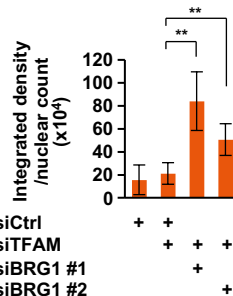**F**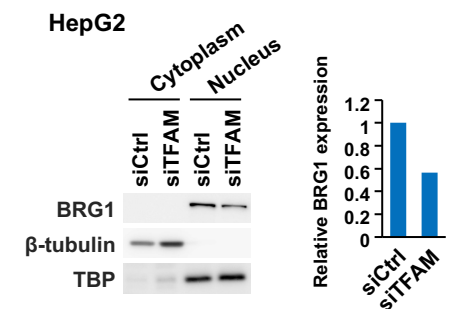**Supplementary Figure S3.**

(A) Detection of super-enhancers using H3K27ac ChIP-seq data in TFAM KD or Control KD HepG2 cells by Homer algorithm.

(B) Target sites of FAIRE-qPCR in the EGF family gene cluster (upper) and the results of FAIRE-qPCR of HepG2 cells under TFAM KD for 24 h ( $n = 3$ ) (lower).

(C) ChromContact (Sato and Suyama, 2015) revealed long-range chromatin interactions between RE3 and promoter of the *AREG* gene in AREG-positive cells but not in AREG-negative cells. The black bar at RE3 indicates the reference site.

(D) Western blot analysis of HepG2 cells under the combined knockdown of TFAM and RE-associated factors for 72 h. For AREG detection, cells were treated with 5  $\mu\text{g}/\text{mL}$  of brefeldin A (BFA) for 6 h.

(E) Quantitative intensity analysis of AREG signals in TFAM and Brg1 double knockdown HepG2 cells (Figure 3F). Four to five immunofluorescence images were randomly examined for the density of AREG signals per image, using Image J software and correction by the number of nuclei.

(F) Representative western blot images of decreased BRG1 in the TFAM-KD HepG2 cells. The band intensity of BRG1 was normalized to TFIID (TBP). Three independent BRG1 experiments were done with similar results.

**A**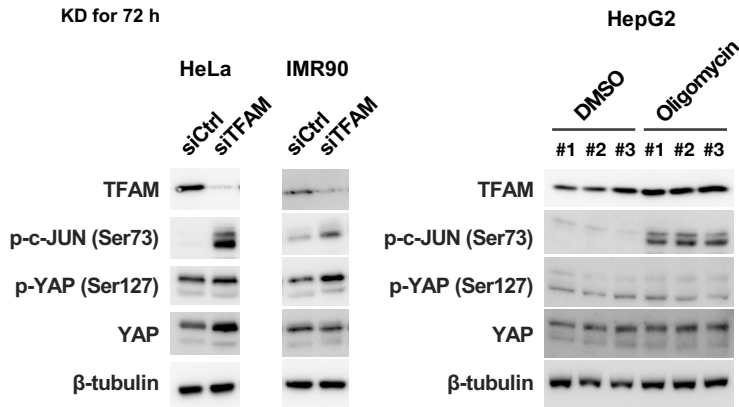**B**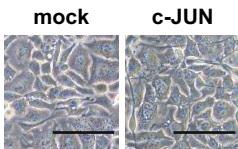**C**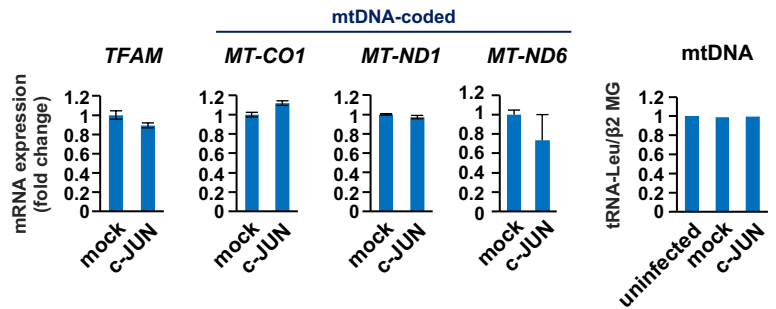**D**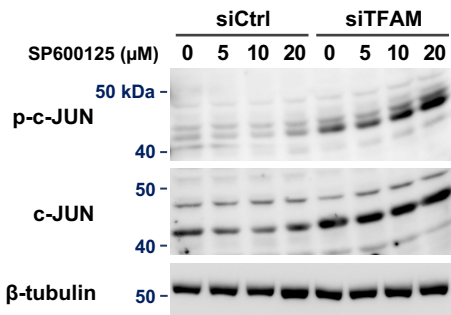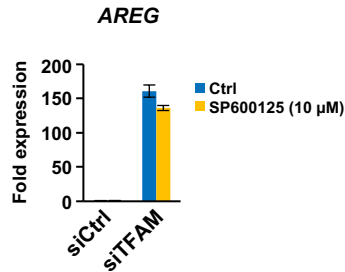**E**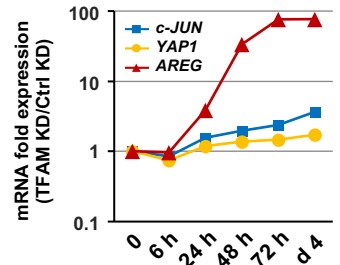**Supplementary Figure S4.**

(A) Western blot analysis of phosphorylated c-JUN and YAP1 using whole cell extracts of TFAM-depleted HeLa or IMR90 cells, and three independent HepG2 cells treated with 0.5 μg/mL oligomycin A for 24 hours.

(B) Representative images of mock and c-JUN-expressing virus infected HepG2 cells (day 7). Scale bar, 100 μm.

(C) Expression of *TFAM*, and mitochondrial DNA (mtDNA)-coded genes such as cytochrome c oxidase subunit 1 (*MT-CO1*), NADH dehydrogenase 1 (*MT-ND1*) and NADH dehydrogenase 6 (*MT-ND6*) in c-JUN overexpressing cells (n=3). Quantification of relative mtDNA copy numbers in c-JUN overexpressing cells.

(D) Western blot analysis (left) or qPCR analysis (right) of SP600125-treated TFAM-depleted HepG2 cells. SP600125 was added to the medium at the indicated concentrations 4 hours after siRNA transfection and cells were cultured for additional 68 hours.

(E) Time-course expression of *AREG*, *c-JUN*, and *YAP1* genes after TFAM KD in HepG2 cells. The fold expression shows a relative value to control KD.



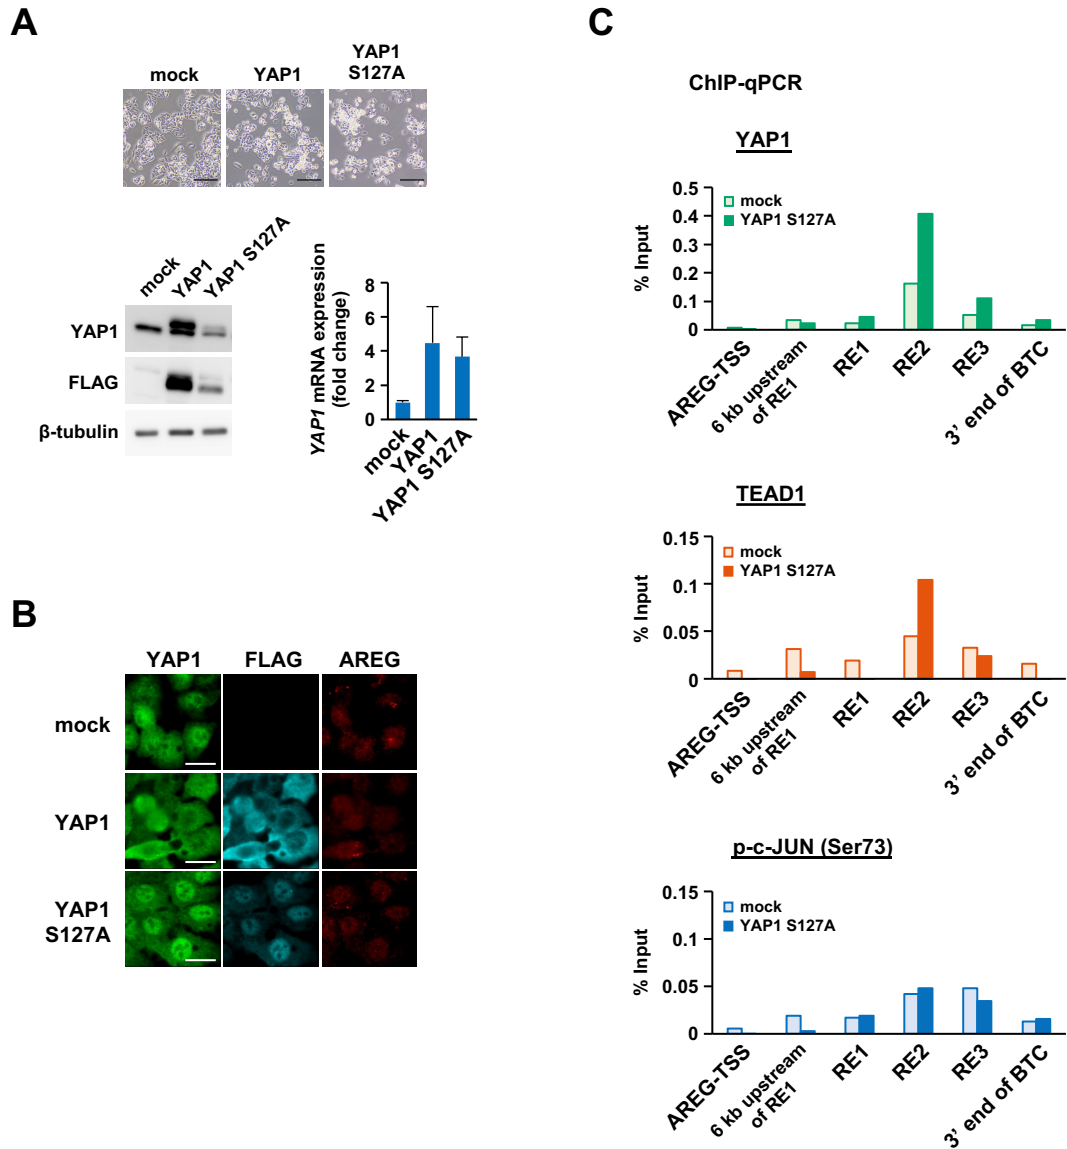

### Supplementary Figure S5.

(A) Overexpression of FLAG-tagged YAP1 and its constitutively active/unstable mutant YAP1(S127A) using lentivirus vectors in HepG2 cells. Representative images of mock, YAP1, and YAP1(S127A)-expressing virus infected cells (day 4). Scale bar, 200  $\mu$ m. Western blot analysis of total YAP1 and FLAG-tagged YAP1 (day 22). RT-qPCR analysis of *YAP1* and *YAP1(S127A)* mRNAs (n=3, day 22 to 36).

(B) Immunofluorescence staining of YAP1/FLAG and AREG in mock and YAP1-overexpressing HepG2 cells (day 22). Scale bar, 20  $\mu$ m.

(C) ChIP-qPCR analysis of mock and YAP1-overexpressing HepG2 cells (day 33). The values were corrected for IgG control.

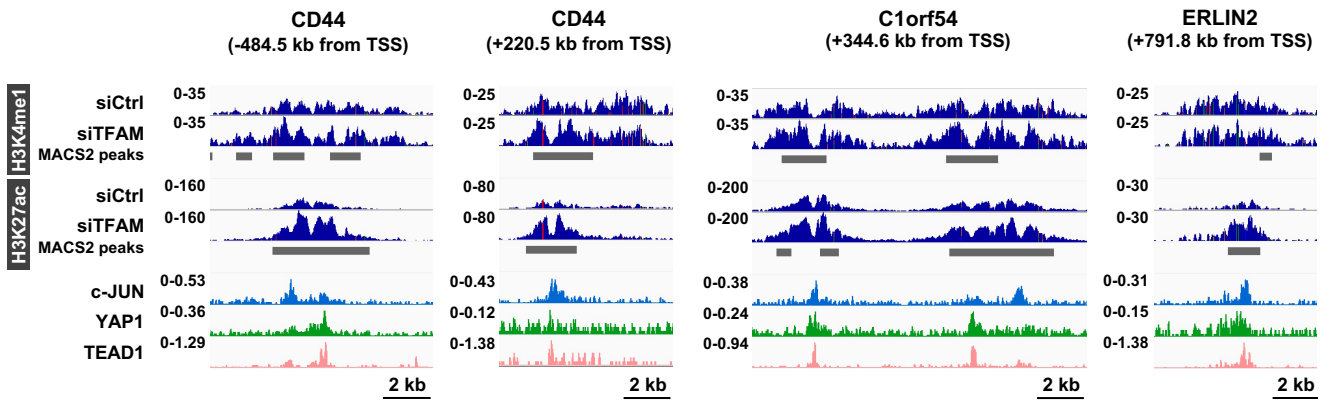

**Supplementary Figure S6.**

Enrichment of active enhancer marks and transcription factors at the enhancer sites of secretory protein genes upregulated by TFAM KD. ChIP-seq data are from GSM1700784 for c-JUN, GSM1614029 for YAP1, and GSM1667161 for TEAD1.

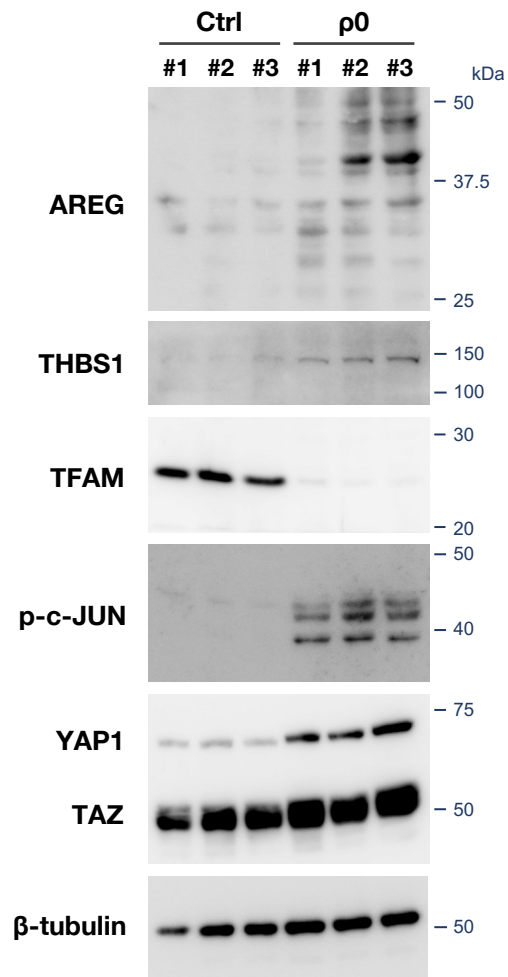

**Supplementary Figure S7.**

Western blot analysis of AREG and related proteins using whole cell extracts of three independent ρ0 cell lines induced from HepG2 for 10 days. For detection of AREG and THBS1, 0.5 μg/mL of brefeldin A was added to the medium for 6 hr.

**A**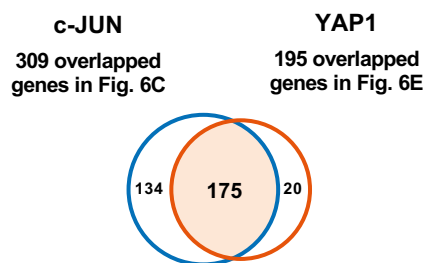**D**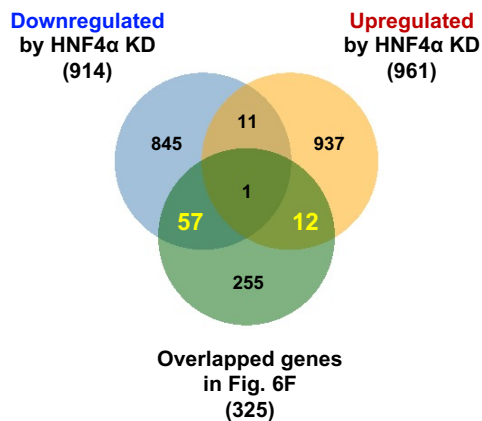**B****c-JUN targets**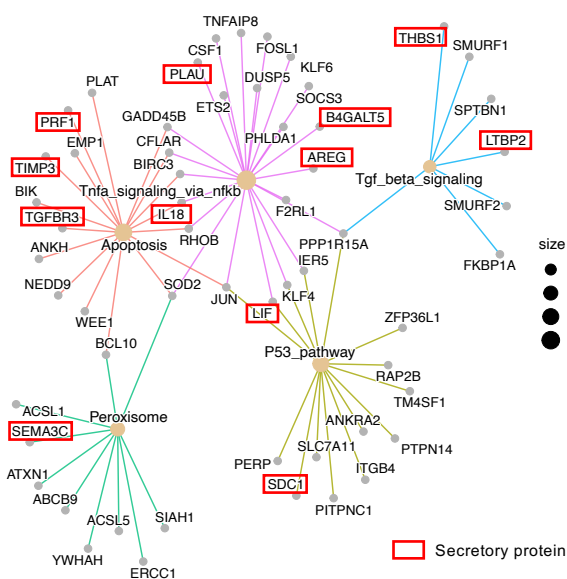**C****YAP1 targets**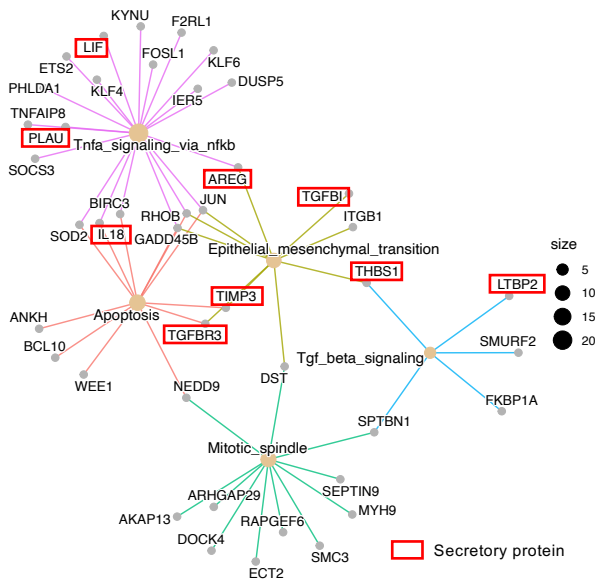**Supplementary Figure S8.****(A)** Overlap between genes regulated by c-JUN and YAP1 under TFAM-KD.**(B, C)** Gene-concept network plots of enriched Hallmark gene sets from MSigDB in Fig. 6D.**(D)** Comparison of 325 overlapped genes in Fig. 6F with up-regulated or down-regulated genes by HNF4α KD in HepG2 cells (Bolontin et al., 2010).

**Supplementary Table S1.** List of siRNAs used in this study.

| siRNAs                   | Sequence (5' → 3')  |
|--------------------------|---------------------|
| siGL3                    | cuuacgcugaguacuucga |
| siTFAM #1                | guuguccaaagaaccugu  |
| siTFAM #2                | gauugagauguguucacaa |
| siAREG                   | cuucgacaagagauggaa  |
| siYAP1                   | gacaucuucuggucagaga |
| siTEAD1                  | ggccgauuuguauaccgaa |
| siSMARCA4 #1             | gucugauagugaagaaagu |
| siSMARCA4 #2             | ccaucauggaagauuacuu |
| siGENOME Human JUN siRNA | M-003268-03         |

**Supplementary Table S2.** List of primers used in this study.

| Primers                 | Sequence (5' → 3')                   | experiment                    |
|-------------------------|--------------------------------------|-------------------------------|
| hTFAM-F                 | TTCCAAGAAGCTAAGGGTGATT               | qRT-PCR                       |
| hTFAM-R                 | CGAGTTTCGTCCTCTTTAGCA                | qRT-PCR                       |
| mTfam-F                 | GCATACAAAGAAGCTGTGAG                 | qRT-PCR                       |
| mTfam-R                 | GTTATATGCTGAACGAGGTC                 | qRT-PCR                       |
| hAREG-F                 | TCTAGTAGTGAACCGTCCTCG                | qRT-PCR                       |
| hAREG-R                 | TTTGGGGGGGCTTAACTACC                 | qRT-PCR                       |
| mAreG-F                 | AACTCTCCACAGGGGACTACG                | qRT-PCR                       |
| mAreG-R                 | CTTCTGTCTTGTITTTCTTGGGC              | qRT-PCR                       |
| hmJUN-F                 | CCTCAACGCCTCGTTCTCT                  | qRT-PCR                       |
| hmJUN-R                 | AGTTCTTGGCGCGGAGGT                   | qRT-PCR                       |
| YAP1-F                  | CCAAGGCTTGACCCTCGTTT                 | qRT-PCR                       |
| YAP1-R                  | GTTGCTGCTGTTGGAGTTG                  | qRT-PCR                       |
| TEAD1-F                 | GCCTCCCAACATCCATAGCA                 | qRT-PCR                       |
| TEAD1-R                 | TCTGTCCACCAGCCGAGATT                 | qRT-PCR                       |
| hRPLP0-F                | GATGCCAGGGGAAGACAG                   | qRT-PCR                       |
| hRPLP0-R                | TCTGCTCCACAATGAAACAT                 | qRT-PCR                       |
| mRplp0-F                | GCGTCCTGGCATTGTCTGT                  | qRT-PCR                       |
| mRplp0-R                | GCAAATGCAGATGGATCAGCC                | qRT-PCR                       |
| SMARCA4-F               | CTGCCGAGAACTCTCCCTC                  | qRT-PCR                       |
| SMARCA4-R               | TGAGCTGACGTCCACTGCTG                 | qRT-PCR                       |
| THBS1-F                 | GAACCACACCAAGAAGACATCC               | qRT-PCR                       |
| THBS1-R                 | GTGGCCAATGTAGTTAGTGCG                | qRT-PCR                       |
| mCD44-F                 | CCAATGAAGTTGGCCCTGAGC                | qRT-PCR                       |
| mCD44-R                 | TGGTTGGCTGCACAGATAGCG                | qRT-PCR                       |
| hMT-COI-reF             | GACGTAGACACACGAGCATATTTCA            | qRT-PCR                       |
| hMT-COI-reR             | AGGACATAGTGGAAGTGAGCTACAAC           | qRT-PCR                       |
| hMT-ND1-reF             | CCACCTTAGCCCTAGCCGTTTA               | qRT-PCR                       |
| hMT-ND1-reR             | GGGTCATGATGGCAGGAGTAAT               | qRT-PCR                       |
| hMT-ND6-reF             | GCGATGGCTATTGAGGAGTATCC              | qRT-PCR                       |
| hMT-ND6-reR             | CACAGCACCAATCCTACCTCCA               | qRT-PCR                       |
| tRNA-Leu (UUR)-F        | CACCCAAGAACAGGGTTTGT                 | qRT-PCR                       |
| tRNA-Leu (UUR)-R        | TGGCCATGGGTATGTTGTTA                 | qRT-PCR                       |
| B2-microglobulin-F      | TGCTGTCTCCATGTTTATGTATCT             | qRT-PCR                       |
| B2-microglobulin-R      | TCTCTGCTCCCCACCTCTAAGT               | qRT-PCR                       |
| AREG TSS-F              | AAACGGCTTGCAGCTAGAGG                 | ChIP, FAIRE                   |
| AREG TSS-R              | AGAAGGTGCTACCCGAAAACC                | ChIP, FAIRE                   |
| 6 kb upstream of RE 1-F | TGTGAGGCAGAACCTACCAG                 | ChIP, FAIRE                   |
| 6 kb upstream of RE 1-R | GGTAAGGGTGCAAGTGGTGG                 | ChIP, FAIRE                   |
| RE 1_center-F           | AGTCACTAAAGGGAACTGGGGA               | ChIP, FAIRE                   |
| RE 1_center-R           | GGGCCTTTGTATAGGAGAGAGAA              | ChIP, FAIRE                   |
| RE 2_center-F           | GCAGCGAAAATCCTACAGCA                 | ChIP, FAIRE                   |
| RE 2_center-R           | TAGACCGAGAAGGAATCCAGC                | ChIP, FAIRE                   |
| RE 3_center-F           | TGGGGAGTGAATCAGCCATTT                | ChIP, FAIRE                   |
| RE 3_center-R           | AAAATGTGTGGCAGTTGTGACG               | ChIP, FAIRE                   |
| RE 1_side-F             | AAGGATTGTAGCCTAGGTTTGC               | ChIP                          |
| RE 1_side-R             | TCCTGTTCTTCTTACCACCAA                | ChIP                          |
| RE 2_side-F             | ATGAGACATAACATGCAGGTCCG              | ChIP                          |
| RE 2_side-R             | CATGGACTGAGGGGTATGT                  | ChIP                          |
| RE 3_side-F             | CTCCATGGTTGGCCATTGAAC                | ChIP                          |
| RE 3_side-R             | TTTGCCTGTGCTCTGCTGAA                 | ChIP                          |
| EPGN TSS-F              | TAAGAAGTCCAGATGACGCTT                | FAIRE                         |
| EPGN TSS-R              | TCTAGACTGACGGGTGGAAGG                | FAIRE                         |
| EREG TSS-F              | GGATGACTTCTGACGGTCC                  | FAIRE                         |
| EREG TSS-R              | GAGCTCAACTGTCTGGTGTCT                | FAIRE                         |
| 3' end of BTC-F         | TAAGTGCCACCTCAGACCA                  | ChIP, FAIRE                   |
| 3' end of BTC-R         | TCTGGGAGTGTGTTGGACATC                | ChIP, FAIRE                   |
| JUN TSS-F               | TCTGCTACCAGTCAACCCCT                 | ChIP                          |
| JUN TSS-R               | CCTGAGAGCGACGCGAG                    | ChIP                          |
| RE 1_EcoRV-F            | NNGATATCAATAATGGTGAGGCACCACTGG       | Luciferase reporter assay     |
| RE 1_BglII-R            | NNAGATCTGTGAGGCCATGAAGAATGATGC       | Luciferase reporter assay     |
| RE 2_XhoI-F             | NNNCTCGAGTACCTTTCCAGGTGAGAG          | Luciferase reporter assay     |
| RE 2_EcoRV-R            | NNGATATCGAGTCAAAATTCATTTGCCCC        | Luciferase reporter assay     |
| RE 3_NheI-F             | NNNGCTAGCCTGTAATCCCAGCTACTGG         | Luciferase reporter assay     |
| RE 3_XhoI-R             | NNNCTCGAGTCACTACTCTGTTTCTC           | Luciferase reporter assay     |
| c-JUN_EcoRI-F           | GACGAATTCATGACTGCAAAGATGGAAAC        | CSII-EF-3xFLAG-JUN-IRES2-Bsd  |
| c-JUN_BamHI-R           | NNNGGATCCTCAAAATGTTTGCAACTGC         | CSII-EF-3xFLAG-JUN-IRES2-Bsd  |
| YAP1_EcoRI-F            | GCAGAATTCATGGATCCCGGGCAGCA           | CSII-EF-3xFLAG-YAP1-IRES2-Bsd |
| YAP1_NotI-R             | TCAGTCTGCCGCGCCGCTATAACCATGTAAGAAAGC | CSII-EF-3xFLAG-YAP1-IRES2-Bsd |

**Supplementary Table S3.** List of genes upregulated or downregulated more than 1.5-fold in TFAM knockdown HepG2 cells.

| Upregulated genes |           |      |      |      | Downregulated genes |           |       |       |       |
|-------------------|-----------|------|------|------|---------------------|-----------|-------|-------|-------|
| Gene              | HepG2     |      | HeLa |      | Gene                | HepG2     |       | HeLa  |       |
|                   | siTFAM #1 | #2   | #1   | #2   |                     | siTFAM #1 | #2    | #1    | #2    |
| AREG              | 48.5      | 6.7  | 3.5  | 3.0  | TFAM                | -13.9     | -33.0 | -30.0 | -53.4 |
| THBS1             | 9.7       | 13.9 | 2.0  | 7.4  | PRKAA2              | -2.5      | -4.5  | -2.1  | -3.4  |
| TNFRSF10D         | 1.6       | 1.6  | 10.2 | 15.5 | RG9MTD3             | -2.1      | -5.6  | -1.9  | -4.5  |
| GRIPAP1           | 13.0      | 8.0  | 2.4  | 2.3  | EGR1                | -2.1      | -2.3  | -4.1  | -2.2  |
| CD44              | 4.3       | 7.4  | 1.6  | 4.2  | LOC100289079        | -2.1      | -1.7  | -3.7  | -3.0  |
| TMEM8A            | 2.2       | 1.6  | 4.0  | 5.5  | KLHL23              | -3.7      | -2.3  | -2.2  | -1.8  |
| TIMM17A           | 2.0       | 2.3  | 3.0  | 3.7  | SEC14L2             | -2.1      | -1.6  | -2.9  | -3.4  |
| JUN               | 2.5       | 2.8  | 3.2  | 2.3  | SUFU                | -20.6     | -1.7  | -1.7  | -1.9  |
| CDC42SE2          | 2.8       | 2.3  | 2.3  | 3.1  | FAM69A              | -2.4      | -2.4  | -2.3  | -2.1  |
| PREPL             | 2.7       | 4.3  | 1.6  | 1.9  | PIAS2               | -2.4      | -1.8  | -2.9  | -2.3  |
| NARG2             | 4.5       | 1.8  | 2.0  | 2.1  | SHB                 | -2.6      | -5.7  | -1.6  | -1.6  |
| PEX13             | 2.5       | 2.6  | 2.5  | 2.8  | GLE1                | -3.3      | -1.9  | -1.7  | -2.6  |
| CRLF3             | 3.4       | 2.0  | 2.8  | 2.1  | ACADSB              | -2.6      | -1.5  | -2.1  | -2.6  |
| PLK2              | 2.2       | 2.2  | 2.5  | 3.4  | COBLL1              | -2.4      | -1.8  | -2.9  | -1.7  |
| SPTLC1            | 1.7       | 2.0  | 1.7  | 4.4  | BCAP29              | -2.9      | -2.2  | -2.2  | -1.5  |
| IFNGR1            | 1.5       | 2.7  | 2.2  | 3.2  | PLEKHA3             | -3.1      | -2.3  | -1.8  | -1.5  |
| C10RF54           | 2.2       | 3.0  | 2.4  | 1.9  | ZNF721              | -2.2      | -1.9  | -1.9  | -2.0  |
| MSI2              | 1.6       | 2.7  | 1.8  | 3.3  | EI24                | -2.6      | -1.7  | -1.9  | -1.9  |
| ALG13             | 2.2       | 3.4  | 1.7  | 1.9  | TADA2A              | -2.2      | -1.6  | -1.7  | -2.2  |
| LOC100507375      | 2.5       | 2.0  | 1.9  | 2.5  | PDK3                | -2.1      | -1.5  | -1.6  | -2.5  |
| FARP1             | 2.5       | 3.1  | 1.7  | 1.5  | WTAP                | -2.0      | -1.6  | -1.6  | -2.2  |
| TM4SF1            | 2.2       | 1.6  | 1.6  | 3.5  | C5ORF44             | -2.1      | -1.9  | -1.7  | -1.7  |
| C6ORF120          | 1.6       | 2.2  | 1.9  | 2.9  | TMCC1               | -2.3      | -1.5  | -1.7  | -1.9  |
| ZNF782            | 1.6       | 1.5  | 3.9  | 1.6  |                     |           |       |       |       |
| ERLIN2            | 1.6       | 1.7  | 1.7  | 3.6  |                     |           |       |       |       |
| TATDN3            | 1.8       | 2.0  | 2.0  | 2.7  |                     |           |       |       |       |
| ZNF281            | 1.8       | 1.5  | 2.6  | 2.5  |                     |           |       |       |       |
| TRAPPC10          | 2.1       | 1.5  | 1.8  | 2.7  |                     |           |       |       |       |
| MANEA             | 2.4       | 1.8  | 1.7  | 2.2  |                     |           |       |       |       |
| ROD1              | 1.5       | 1.5  | 2.3  | 2.8  |                     |           |       |       |       |
| APAF1             | 1.7       | 2.0  | 1.6  | 2.8  |                     |           |       |       |       |
| ZNF451            | 2.0       | 2.1  | 1.5  | 2.3  |                     |           |       |       |       |
| ZKSCAN3           | 2.5       | 2.0  | 1.6  | 1.5  |                     |           |       |       |       |
| RHOB              | 1.6       | 1.6  | 1.7  | 2.7  |                     |           |       |       |       |
| HIST1H2AK         | 1.5       | 2.3  | 1.8  | 1.9  |                     |           |       |       |       |
| TNFRSF21          | 1.8       | 1.8  | 1.6  | 2.3  |                     |           |       |       |       |
| MREG              | 1.6       | 2.1  | 2.0  | 1.6  |                     |           |       |       |       |
| MYO6              | 1.9       | 1.5  | 2.0  | 1.8  |                     |           |       |       |       |
| EXOC5             | 2.1       | 1.6  | 1.9  | 1.6  |                     |           |       |       |       |
| LOC254128         | 2.1       | 2.0  | 1.6  | 1.5  |                     |           |       |       |       |
| ZNF891            | 1.8       | 1.6  | 1.6  | 2.2  |                     |           |       |       |       |
| RNF4              | 1.8       | 1.8  | 1.5  | 1.9  |                     |           |       |       |       |
| TMEM80            | 1.6       | 2.1  | 1.8  | 1.5  |                     |           |       |       |       |
| LRRC57            | 1.9       | 1.9  | 1.6  | 1.5  |                     |           |       |       |       |
| CFL1              | 1.6       | 1.8  | 1.5  | 1.9  |                     |           |       |       |       |
| TRIM38            | 1.8       | 1.6  | 1.6  | 1.8  |                     |           |       |       |       |
| SGK494            | 1.8       | 1.5  | 1.7  | 1.7  |                     |           |       |       |       |
| YIPF4             | 1.5       | 1.6  | 2.0  | 1.5  |                     |           |       |       |       |
| C5ORF41           | 1.5       | 1.7  | 1.6  | 1.8  |                     |           |       |       |       |
| C16ORF57          | 1.5       | 1.6  | 1.9  | 1.5  |                     |           |       |       |       |
| MTX3              | 1.5       | 1.7  | 1.5  | 1.8  |                     |           |       |       |       |
| SENP7             | 1.5       | 1.7  | 1.5  | 1.7  |                     |           |       |       |       |

**Supplementary Table S4.** ChIP-Atlas analysis of REs-associated transcriptional regulators in TFAM knockdown HepG2 cells.

| Rank | ID         | Antigen             | Cell       | Log P-val | Log Q-val | Fold Enrichment |
|------|------------|---------------------|------------|-----------|-----------|-----------------|
| 1    | SRX1123964 | <b>SMARCA4/BRG1</b> | HCT 116    | -23.769   | -22.961   | 85.00           |
| 2    | SRX1569429 | <b>BRD4</b>         | HCT 116    | -23.470   | -22.665   | 84.00           |
| 3    | SRX360377  | <b>EP300/p300</b>   | HCT 116    | -152.461  | -151.041  | 67.50           |
| 4    | SRX360376  | <b>KMT2D/MLL4</b>   | HCT 116    | -170.244  | -168.775  | 60.60           |
| 5    | SRX084521  | <b>ETV4</b>         | PC-3       | -13.965   | -13.268   | 52.00           |
| 6    | SRX1044411 | <b>JUN/c-Jun</b>    | MDA-MB-231 | -226.538  | -224.947  | 47.88           |
| 7    | SRX2020849 | <b>STAT3</b>        | HCC1143    | -49.442   | -48.457   | 46.25           |
| 8    | SRX398302  | <b>CDK8</b>         | SW 480     | -48.846   | -47.863   | 45.75           |
| 9    | SRX1384029 | <b>ATF3</b>         | HCT 116    | -132.765  | -131.416  | 41.25           |
| 10   | SRX2585779 | <b>FOSL1</b>        | MDA-MB-231 | -324.000  | -324.000  | 40.97           |
| 11   | SRX1531785 | <b>MED1</b>         | A549       | -20.956   | -20.175   | 40.00           |
| 12   | SRX1123965 | <b>SMARCC1</b>      | HCT 116    | -20.956   | -20.175   | 40.00           |
| 13   | SRX1538803 | <b>JUND</b>         | HT-29      | -205.865  | -204.318  | 39.89           |
| 14   | SRX366167  | <b>SMAD3</b>        | NCI-H441   | -215.315  | -213.753  | 34.96           |
| 15   | SRX1650401 | <b>NR3C1</b>        | A549       | -99.253   | -98.028   | 34.64           |
| 16   | SRX092306  | <b>FOS/c-Fos</b>    | K-562      | -156.595  | -155.162  | 33.17           |
| 17   | SRX825397  | <b>IRF1</b>         | CFPAC-1    | -215.662  | -214.098  | 32.52           |
| 18   | SRX092300  | <b>JUNB</b>         | K-562      | -143.944  | -142.555  | 32.47           |
| 19   | SRX190228  | <b>TEAD4</b>        | HCT 116    | -202.956  | -201.417  | 32.04           |
| 20   | SRX883577  | <b>YAP1</b>         | MDA-MB-231 | -44.014   | -43.059   | 29.17           |
| 21   | SRX190308  | <b>CEBPB</b>        | HCT 116    | -324.000  | -324.000  | 27.08           |
| 22   | SRX883578  | <b>WWTR1/TAZ</b>    | MDA-MB-231 | -73.849   | -72.741   | 26.91           |
| 23   | SRX1389378 | <b>ELF3</b>         | CFPAC-1    | -209.387  | -207.835  | 19.95           |
| 24   | SRX359886  | <b>ETV5</b>         | LoVo       | -56.574   | -55.551   | 18.77           |
| 25   | SRX1011298 | <b>TEAD1</b>        | HuCCT1     | -138.022  | -136.655  | 18.34           |

Cutoff  $p < 1e-5$   
Rank by Fold Enrichment  
Excluded AREG negative cells  
(CCLE RNA-seq <1)



**Supplementary Table S5.** List of AP-1 and TEAD binding motifs at RE sequences.

| Seq. name                          | Detailed Matrix Information | Anchor position | Strand | Matrix sim.   | Sequence       |
|------------------------------------|-----------------------------|-----------------|--------|---------------|----------------|
| 3.6 kb region around RE1           | AP1                         | 1347            | -      | 0.961         | tgatGAGTaatgc  |
|                                    | AP1                         | 1761            | +      | 0.990         | caatgAGTCacta  |
|                                    | AP1                         | 1761            | -      | 0.964         | tagtgACTCattg  |
| 3 kb region around RE2             | AP1                         | 288             | -      | 0.907         | aattGAGTaagaa  |
|                                    | AP1                         | 694             | +      | 0.880         | ttctGAGTtagaa  |
|                                    | TEAD 1,3,4,5                | 843             | +      | 0.956         | cgctCATTccacaa |
|                                    | AP1                         | 1130            | -      | 0.886         | tcctGAGTtatta  |
|                                    | AP1                         | 1801            | +      | 0.955         | ttctgACTCagat  |
|                                    | AP1                         | 1801            | -      | 0.978         | atctgAGTCagaa  |
|                                    | AP1                         | 2185            | +      | 0.896         | acatGAGTaaaaa  |
|                                    | AP1                         | 2555            | +      | 0.975         | ccttgAGTCatag  |
|                                    | AP1                         | 2555            | -      | 0.963         | ctatgACTCaagg  |
| 3 kb region around RE3             | AP1                         | 934             | +      | 1.000         | ggctGAGtcagga  |
|                                    | AP1                         | 934             | -      | 0.976         | tccTGACTcagcc  |
|                                    | AP1                         | 1246            | +      | 0.962         | gagtgAATCagcc  |
|                                    | Jun dimerization protein 2  | 1246            | -      | 0.888         | ggctgaTTCActc  |
|                                    | AP1                         | 1282            | -      | 0.978         | ttctgAGTCagtc  |
|                                    | AP1                         | 1282            | +      | 0.956         | gacTGACTcagaa  |
|                                    | AP1                         | 1348            | +      | 0.997         | atatgAGTCataa  |
|                                    | AP1                         | 1348            | -      | 0.973         | ttatgACTCatat  |
|                                    | TEAD 1,3,4,5                | 2355            | -      | 0.911         | ttcCATTccaagc  |
|                                    | TEAD 1,3,4,5                | 2372            | -      | 0.905         | ttcCATTccaagt  |
| AP1                                | 2714                        | +               | 0.940  | tgctGAGTaatta |                |
| AP1                                | 2881                        | +               | 0.896  | aaatGAGTaatg  |                |
| <b>ChIP-qPCR amplified regions</b> |                             |                 |        |               |                |
| RE1                                | 1760-1838                   |                 |        |               |                |
| RE2                                | 1454-1525                   |                 |        |               |                |
| RE3                                | 1236-1301                   |                 |        |               |                |

**Supplementary Table S6. List of overlapped genes in Figure 6 (C), (E) and (F).**

| HepG2 siTFAM #1<br>Proximal active enhancer mark<br>Proximal binding transcription factor | genes in Fig. 6C (309 genes)     |              |          |               | genes Fig. 6E (195 genes)       |          |           |          | genes in Fig. 6F (325 genes)    |           |  |  |
|-------------------------------------------------------------------------------------------|----------------------------------|--------------|----------|---------------|---------------------------------|----------|-----------|----------|---------------------------------|-----------|--|--|
|                                                                                           | ≥ 1.5 fold<br>increased<br>c-JUN |              |          |               | ≥ 1.5 fold<br>increased<br>YAP1 |          |           |          | < 0.67 fold<br>reduced<br>HNF4a |           |  |  |
| ABC9                                                                                      | DTWD1                            | LIMS1        | RAP2B    | ABTB2         | FLJ10661                        | PHLDA1   | ABCC11    | DDC      | KIFC3                           | RTEL1     |  |  |
| ABTB2                                                                                     | DUSP3                            | LIPC         | RAPGEF2  | ACSL5         | FLJ32255                        | PION     | ABCC3     | DEPDC6   | KLHL23                          | RXRA      |  |  |
| ACP6                                                                                      | DUSP5                            | LIPH         | RAPGEF6  | ADAM19        | FLJ42351                        | PLAU     | ABCC6     | DIDD1    | KYNU                            | SAMHD1    |  |  |
| ACSL1                                                                                     | E2F7                             | LOC100499467 | RHBDD1   | AGPAT9        | FOSL1                           | PLS1     | ABCC6P1   | DIO1     | LASS6                           | SAR1B     |  |  |
| ACSL5                                                                                     | EFHD2                            | LOC100506860 | RHOB     | AKAP12        | FOXP1                           | PLXNC1   | ACADSB    | DLGAP4   | LCA5                            | SC5DL     |  |  |
| ACSS1                                                                                     | EIF2C2                           | LOC149086    | RHOV     | AKAP13        | FRMD5                           | POLA2    | ACSL6     | DLX1     | LGALS2                          | SCFD2     |  |  |
| ACTR5                                                                                     | ELK3                             | LOC401233    | RNF128   | ANK1          | FRYL                            | PPP1R1C  | ACSM3     | DNAH1    | LGALS3                          | SCML4     |  |  |
| ADAM19                                                                                    | EMP1                             | LOC730755    | RNF144B  | ANKH          | GADD45B                         | PRKCA    | ADAT2     | DNAJB2   | LGALS8                          | SEC24A    |  |  |
| AGA                                                                                       | ENAH                             | LPP          | RNF145   | ANKRA2        | GALNT10                         | PRSS23   | ADCK3     | DNAJB12  | LIME1                           | SEPP1     |  |  |
| AGPAT9                                                                                    | EPB41                            | LRP6         | RNF145   | ANKRD28       | GAP43                           | PSD3     | ADH6      | DNAJB4   | LOC100288198                    | SERPINC1  |  |  |
| AK2                                                                                       | ERCC1                            | LTBP1        | S100A2   | ANKRD5        | GRAMD1A                         | PTPN14   | AGT       | DOCK5    | LOC400960                       | SERPIND1  |  |  |
| AKAP13                                                                                    | ETS2                             | LTBP2        | S100A3   | ANXA3         | GRAMD1C                         | PTPRS    | AGXT      | DPEP1    | LOC729970                       | SGMS1     |  |  |
| AKR1C1                                                                                    | EXOC1                            | LYST         | S100A6   | AREG          | GRAMD3                          | PYGB     | AGXT2     | DPYSL4   | LPP                             | SH3BP2    |  |  |
| ANK1                                                                                      | EZR                              | LZTS2        | SDC1     | ARHGAP29      | GRB10                           | RAH4     | AK2       | ECH1     | LPPR1                           | SH3D9     |  |  |
| ANKH                                                                                      | F2RL1                            | MALAT1       | SDPR     | ARID3B        | GRB14                           | RAPGEF2  | AK4       | EIF4EBP2 | LTK                             | SH3TC1    |  |  |
| ANKRA2                                                                                    | F5                               | MAS74        | SEMA3C   | ATG16L1       | HS3ST3A1                        | RAPGEF6  | AKR1D1    | ELL      | MAD1L1                          | SH3YL1    |  |  |
| ANKRD28                                                                                   | FAM107B                          | MCC          | SEPTIN9  | ATPB81        | HSPH1                           | RBMS2    | AKT2      | ELP3     | MAP4K4                          | SHANK2    |  |  |
| ANKRD5                                                                                    | FAM110B                          | MCCC2        | SERPINE2 | ATXN7L1       | IER5                            | RHOB     | ALAD      | EMLE     | MAT1A                           | SIK2      |  |  |
| ANTXR2                                                                                    | FAM172A                          | MCTP1        | SH2D4A   | AVL9          | IL18                            | RHOJ     | AMACR     | EPB41L1  | MB                              | SIL1      |  |  |
| ANXA3                                                                                     | FAM201A                          | MECOM        | SH2D5    | BBS10         | IPMK                            | RNF144B  | ANKRD55   | EPHX2    | MCFD2                           | SKI       |  |  |
| AREG                                                                                      | FGD6                             | MET          | SH3BGR13 | BCL10         | ITGA6                           | RNF43    | ANKRD57   | ETV5     | MEGF9                           | SLC13A5   |  |  |
| ARG2                                                                                      | FHL3                             | METT5D1      | SH3BP4   | BIRC3         | ITGB1                           | RUNX1    | ANKS4B    | FARP1    | MERTK                           | SLC26A3   |  |  |
| ARHGAP29                                                                                  | FKBP1A                           | METTL13      | SH3BP1   | C12orf75      | ITGB4                           | S100A2   | ANPEP     | FAH      | MFSD9                           | SLC27A2   |  |  |
| ARID3B                                                                                    | FLJ10661                         | MGC11082     | SH2D4A   | C1GALT1       | ITPRIPL2                        | SDPR     | ANTXR1    | FAM117A  | MLANA                           | SLC39A5   |  |  |
| ATG16L1                                                                                   | FLJ32255                         | MICAL2       | SLC22A16 | C1orf107      | JUN                             | SEMA3C   | ANXA6     | FAM13A   | MPRIP                           | SLC44A1   |  |  |
| ATP8B1                                                                                    | FLJ42351                         | MKLN1        | SLC35D2  | C3orf65       | KIAA0226                        | SEPTIN9  | AOX1      | FAM176B  | MRPL35                          | SLC46A1   |  |  |
| ATXN1                                                                                     | FMNL2                            | MREG         | SLC7A11  | C9orf3        | KIAA0754                        | SH2D4A   | APOH      | FAM178A  | MTRF1                           | SLC47A1   |  |  |
| ATXN7L1                                                                                   | FOSL1                            | MRPL51       | SLFN5    | C9orf30       | KIAA0802                        | SH2D5    | APOL6     | FAM20A   | MTSS1                           | SLC6A4    |  |  |
| AVL9                                                                                      | FOXP1                            | MYH9         | SMC3     | CAPN2         | KLF4                            | SH3BP4   | ARHGAP26  | FAM3B    | MYO7A                           | SLC7A9    |  |  |
| B4GALT5                                                                                   | FRMD5                            | MYO6         | SMURF1   | CBLB          | KLF5                            | SLC22A16 | ARHGAP10L | FAM69A   | NBR2                            | SLC02B1   |  |  |
| BAZ1A                                                                                     | FRYL                             | MYOF         | SMURF2   | CCDC148       | KLF6                            | SLC7A11  | ASAP3     | FAM8A1   | NDUFC2                          | SMAD6     |  |  |
| BBS10                                                                                     | GADD45B                          | MYSM1        | SOC3     | CLDN1         | KLHL31                          | SMC3     | ASH2L     | FARP1    | NEDD4L                          | SNX24     |  |  |
| BCL10                                                                                     | GALNT10                          | NAA30        | SOC5     | CLIP4         | KLRC3                           | SMURF2   | ASRGL1    | FBXO31   | NEDD9                           | SNX29     |  |  |
| BFSF1                                                                                     | GAP43                            | NAV2         | SOD2     | CP            | KYNU                            | SOC3     | ATP2C2    | FGFR4    | NELF                            | SOAT2     |  |  |
| BIK                                                                                       | GATA6                            | NCRNA00162   | SPATS2L  | CPLX2         | LIF                             | SOD2     | ATP7B     | FITM1    | NEU4                            | SOD2      |  |  |
| BIRC3                                                                                     | GCOM1                            | NEDD4L       | SPTNB1   | CPXCR1        | LOC730755                       | SPATS2L  | ATXN1L    | FOXN3    | NFATC3                          | SORL1     |  |  |
| C12orf75                                                                                  | GJC1                             | NEDD9        | SSFA2    | CREB5         | LPP                             | SPTBN1   | ATXN2     | FRMD3    | NFE2L2                          | SPAG9     |  |  |
| C14orf128                                                                                 | GLS                              | NR1D2        | STAMBPL1 | CSGALNACT1    | LRP6                            | STK4     | AURKAIP1  | FRS2     | NQO1                            | SPIRE1    |  |  |
| C16orf45                                                                                  | GNAI1                            | NRP1         | STK17A   | CSTF2T        | LRR6                            | SVIL     | B9D1      | FSD1L    | NR1H4                           | SPOCK2    |  |  |
| C1GALT1                                                                                   | GPR56                            | NRP2         | SVIL     | CYP24A1       | LTBP2                           | TBC1D8   | BATF2     | FTH1     | NTSC2                           | SPTLC3    |  |  |
| C1orf107                                                                                  | GPRC5A                           | NUAK1        | SYTL4    | DCAF5         | LYST                            | TCF11L2  | BCL2L13   | GALM     | OSTalpha                        | SSBP3     |  |  |
| C3orf65                                                                                   | GRAMD1C                          | OSBPL3       | TAF1B    | DCBLD2        | MALAT1                          | TEAD1    | BCR       | GANC     | OSTBETA                         | ST3GAL1   |  |  |
| C9orf3                                                                                    | GRAMD3                           | OTUD1        | TANC1    | DCP2          | MCC                             | TGFB1    | BDH1      | GAPVD1   | PARP12                          | STK11     |  |  |
| C9orf30                                                                                   | GRB10                            | PAK6         | TBC1D8   | DFNA5         | MCTP1                           | TGFBR3   | C10orf58  | GCNT2    | PCSK6                           | STOX1     |  |  |
| CAMTA1                                                                                    | GRB14                            | PAQR5        | TCF7L2   | DKFZp686O1327 | MECOM                           | THBS1    | C11orf75  | GFPT1    | PCSK9                           | STXBPA    |  |  |
| CAPN2                                                                                     | HAS3                             | PARD3        | TCF11L2  | DOCK4         | MET                             | TIMP3    | C12orf72  | GLRX     | PDE11A                          | SUSD2     |  |  |
| CB1                                                                                       | HS3ST3A1                         | PARP11       | TEAD1    | DOCK9         | MGC11082                        | TLE1     | C16orf87  | GNAQ     | PDE4D                           | TASP1     |  |  |
| CBLB                                                                                      | HSPH1                            | PAWR         | TGFB1    | DOPEY2        | MKLN1                           | TMEM106B | C17orf89  | GNG4     | PDE4DIP                         | TGC1D22A  |  |  |
| CD9                                                                                       | HTR7                             | PDLM3        | TGFBR3   | DST           | MRPL51                          | TMEM156  | C18orf45  | GNNPAT1  | PDXDC1                          | TGOLN2    |  |  |
| CD97                                                                                      | IER5                             | PDLM4        | THBS1    | DTNA          | MYH9                            | TNFAIP8  | C1orf113  | GOSR2    | PDZK1                           | THADA     |  |  |
| CFLAR                                                                                     | IER5L                            | PDP1         | TIMP3    | DTWD1         | MYOF                            | TNFRSF21 | C1orf115  | GPD1     | PER2                            | TKT       |  |  |
| CHGB                                                                                      | IL18                             | PEAR1        | TLE1     | DUSP5         | NAA30                           | TRIL     | C20orf112 | GPR107   | PEX14                           | TLE4      |  |  |
| CHST3                                                                                     | IPMK                             | PERP         | TM4SF1   | E2F7          | NAV2                            | TTC32    | C22orf36  | GPR160   | PHLPP1                          | TMCC1     |  |  |
| CLIP4                                                                                     | IRF2BP2                          | PFKP         | TMEM45B  | ECT2          | NCRNA00162                      | UBASH3B  | C2orf72   | GREB1    | PIK3P1                          | TMEM106A  |  |  |
| CMTM7                                                                                     | ITGA6                            | PHLDA1       | TNFAIP8  | EFHD2         | NEDD4L                          | VRK2     | C3orf32   | GRTP1    | PLA2G1B                         | TMEM127   |  |  |
| COBLL1                                                                                    | ITGB1                            | PION         | TNFRSF21 | ELF5          | NEDD9                           | WDFY3    | C4orf34   | GTPBP1   | PLEKHA6                         | TMEM17    |  |  |
| COL27A1                                                                                   | ITGB4                            | PITPNC1      | TPBG     | ELK3          | NR1D2                           | WEE1     | C7orf30   | H1FX     | PLEKHA7                         | TMEM37    |  |  |
| CP                                                                                        | ITPR3                            | PKN2         | TRIL     | ENAH          | NRP1                            | ZAK      | ADAM4     | HAL      | PLLP                            | TNFSF10   |  |  |
| CPLX2                                                                                     | ITPRIPL2                         | PLAT         | TTC32    | ETS2          | NUAK1                           | ZBTB20   | CALML4    | HAVCR1   | PLXNA2                          | TNS1      |  |  |
| CREB5                                                                                     | JUN                              | PLAU         | TTC39C   | EXOC6B        | OSBPL3                          | ZFH3     | CAMK2D    | HDHD3    | PMVK                            | TOR3A     |  |  |
| CSDA                                                                                      | KIAA0226                         | PLEKHF2      | UBASH3B  | F2RL1         | OTUD1                           | ZFP36L1  | CAPN12    | HES6     | POLR3H                          | TP53INP2  |  |  |
| CSF1                                                                                      | KIAA0802                         | PLXNC1       | VRK2     | FAM107B       | PARD3                           | ZG16B    | CAPN3     | HGD      | PPA2                            | TRAPPPC10 |  |  |
| CSGALNACT1                                                                                | KIAA1217                         | POLA2        | WDFY3    | FAM172A       | PEAR1                           | ZMIZ2    | CCDC34    | HIPK2    | PPARA                           | TRIM2     |  |  |
| CTSC                                                                                      | KIAA1549                         | PPFIBP1      | WEE1     | FAM201A       | PELO                            | ZNF608   | CCDC58    | HKDC1    | PPARGC1B                        | TSKU      |  |  |
| CWF19L2                                                                                   | KIF2A                            | PPP1R15A     | YAP1     | FKBP1A        | PFKP                            | ZSCAN20  | CEP57L1   | HPR      | PPM1H                           | TLL11     |  |  |
| CYP24A1                                                                                   | KIF3C                            | PPP1R1C      | YWHAH    |               |                                 |          | CHST13    | HSDL2    | PPP6R2                          | TULP4     |  |  |
| DCAF5                                                                                     | KLF4                             | PRF1         | ZAK      |               |                                 |          | CHST15    | IDH1     | PRICKLE2                        | UBA5      |  |  |
| DCBLD2                                                                                    | KLF5                             | PRKCA        | ZBTB20   |               |                                 |          | CHST9     | IFT88    | PRKAR1A                         | UBE2O     |  |  |
| DCP2                                                                                      | KLF6                             | PROX1        | ZBTB38   |               |                                 |          | CNNM2     | IKZF4    | PRLR                            | UNC45A    |  |  |
| DFNA5                                                                                     | KLHL31                           | PRSS23       | ZDHHC14  |               |                                 |          | CNNM3     | IL1R1    | PRR5                            | USP18     |  |  |
| DHX32                                                                                     | KLRC3                            | PSD3         | ZFH3     |               |                                 |          | COMT      | IL1RAP   | PTK7                            | USP2      |  |  |
| DKFZp686O1327                                                                             | KRT12                            | PTPN14       | ZFP36L1  |               |                                 |          | COQ9      | INPP5F   | PTP4A2                          | VASH2     |  |  |
| DOCK4                                                                                     | KRT19                            | PTPN3        | ZG16B    |               |                                 |          | CPLX1     | IQSEC1   | PTPRA                           | VDR       |  |  |
| DOCK9                                                                                     | KRT23                            | PTPRS        | ZMIZ2    |               |                                 |          | CRYBB2P1  | ITIH3    | QKI                             | VEGFA     |  |  |
| DOPEY2                                                                                    | LARP6                            | PYGB         | ZNF193   |               |                                 |          | CRYL1     | ITPR1    | QPRT                            | VIL1      |  |  |
| DSG2                                                                                      | LEKR1                            | RAH4         | ZNF608   |               |                                 |          | CSNK2A1   | ITPR2    | RAB36                           | WNK1      |  |  |
| DST                                                                                       | LIF                              | RALB         | ZSCAN20  |               |                                 |          | CTAGE5    | KHK      | RAD52                           | ZCCHC14   |  |  |
| DTNA                                                                                      |                                  |              |          |               |                                 |          | CTGF      | KIAA1161 | RAP1GAP                         | ZFYVE20   |  |  |
|                                                                                           |                                  |              |          |               |                                 |          | CYP19A1   | KIAA1919 | RIN3                            | ZHX3      |  |  |
|                                                                                           |                                  |              |          |               |                                 |          | CYP4F12   | KIF16B   | RNF103                          | ZNF556    |  |  |
|                                                                                           |                                  |              |          |               |                                 |          | CYP4F3    | KIF9     | RPRD2                           | ZNF787    |  |  |
|                                                                                           |                                  |              |          |               |                                 |          | CYTH1     |          |                                 |           |  |  |
